# Supplementary material
Source: MDPI journal article supplement (https://www.mdpi.com/2673-3846/5/4/41)
Supplement: s1 [file s1]

**Table S1: Supplementary for ICD-10 codes used for our analysis**

|                         |                                                                                                                                                                                                                                                                                                                                                                                                                                                                                                                                                                                                                                                                                                                                                                                                                                                                                                                                                                                                                                                                                                                                                                                                                                                                                                                                                                                                                                                                                                                                                                                                                                                                                                                                                                                                                                                                                  |
|-------------------------|----------------------------------------------------------------------------------------------------------------------------------------------------------------------------------------------------------------------------------------------------------------------------------------------------------------------------------------------------------------------------------------------------------------------------------------------------------------------------------------------------------------------------------------------------------------------------------------------------------------------------------------------------------------------------------------------------------------------------------------------------------------------------------------------------------------------------------------------------------------------------------------------------------------------------------------------------------------------------------------------------------------------------------------------------------------------------------------------------------------------------------------------------------------------------------------------------------------------------------------------------------------------------------------------------------------------------------------------------------------------------------------------------------------------------------------------------------------------------------------------------------------------------------------------------------------------------------------------------------------------------------------------------------------------------------------------------------------------------------------------------------------------------------------------------------------------------------------------------------------------------------|
| Single vessel CABG      | 0210083 0210088 0210089 021008C 021008F 021008W 0210093 0210098<br>0210099 021009C 021009F 021009W 02100A3 02100A8 02100A9 02100AC<br>02100AF 02100AW 02100J3 02100J8 02100J9 02100JC 02100JF 02100JW<br>02100K3 02100K8 02100K9 02100KC 02100KF 02100KW 02100Z3 02100Z8<br>02100Z9 02100ZC 02100ZF 0210444 0210483 0210488 0210489 021048C<br>021048F 021048W 0210493 0210498 0210499 021049C 021049F 021049W<br>02104A3 02104A8 02104A9 02104AC 02104AF 02104AW 02104D4 02104J3<br>02104J8 02104J9 02104JC 02104JF 02104JW 02104K3 02104K8 02104K9<br>02104KC 02104KF 02104KW 02104Z3 02104Z8 02104Z9 02104ZC 02104ZF                                                                                                                                                                                                                                                                                                                                                                                                                                                                                                                                                                                                                                                                                                                                                                                                                                                                                                                                                                                                                                                                                                                                                                                                                                                          |
| Two or more vessel CABG | 0211083 0212083 0213083 0211088 0212088 0213088 0211089 0212089<br>0213089 021108C 021208C 021308C 021108F 021208F 021308F 021108W<br>021208W 021308W 0211093 0212093 0213093 0211098 0212098 0213098<br>0211099 0212099 0213099 021109C 021209C 021309C 021109F 021209F<br>021309F 021109W 021209W 021309W 02110A3 02120A3 02130A3<br>02110A8 02120A8 02130A8 02110A9 02120A9 02130A9 02110AC 02120AC<br>02130AC 02110AF 02120AF 02130AF 02110AW 02120AW 02130AW 02110J3<br>02120J3 02130J3 02110J8 02120J8 02130J8 02110J9 02120J9 02130J9<br>02110JC 02120JC 02130JC 02110JF 02120JF 02130JF 02110JW 02120JW<br>02130JW 02110K3 02120K3 02130K3 02110K8 02120K8 02130K8 02110K9<br>02120K9 02130K9 02110KC 02120KC 02130KC 02110KF 02120KF 02130KF<br>02110KW 02120KW 02130KW 02110Z3 02120Z3 02130Z3 02110Z8 02120Z8<br>02130Z8 02110Z9 02120Z9 02130Z9 02110ZC 02120ZC 02130ZC 02110ZF<br>02120ZF 02130ZF 0211444 0212444 0213444 0211483 0212483 0213483<br>0211488 0212488 0213488 0211489 0212489 0213489 021148C 021248C<br>021348C 021148F 021248F 021348F 021148W 021248W 021348W 0211493<br>0212493 0213493 0211498 0212498 0213498 0211499 0212499 0213499<br>021149C 021249C 021349C 021149F 021249F 021349F 021149W 021249W<br>021349W 02114A3 02124A3 02134A3 02114A8 02124A8 02134A8 02114A9<br>02124A9 02134A9 02114AC 02124AC 02134AC 02114AF 02124AF 02134AF<br>02114AW 02124AW 02134AW 02114D4 02124D4 02134D4 02114J3 02124J3<br>02134J3 02114J8 02124J8 02134J8 02114J9 02124J9 02134J9 02114JC<br>02124JC 02134JC 02114JF 02124JF 02134JF 02114JW 02124JW 02134JW<br>02114K3 02124K3 02134K3 02114K8 02124K8 02134K8 02114K9 02124K9<br>02134K9 02114KC 02124KC 02134KC 02114KF 02124KF 02134KF 02114KW<br>02124KW 02134KW 02114Z3 02124Z3 02134Z3 02114Z8 02124Z8 02134Z8<br>02114Z9 02124Z9 02134Z9 02114ZC 02124ZC 02134ZC 02114ZF 02124ZF<br>02134ZF |
| Single vessel PCI       | 0270346 027034Z 0270356 027035Z 0270366 027036Z 0270376 027037Z<br>02703D6 02703DZ 02703E6 02703EZ 02703F6 02703FZ 02703G6 02703GZ<br>02703T6 02703TZ 02703Z6 02703ZZ 0270446 027044Z 0270456 027045Z<br>0270466 027046Z 0270476 027047Z 02704D6 02704DZ 02704E6 02704EZ<br>02704F6 02704FZ 02704G6 02704GZ 02704T6 02704TZ 02704Z6 02704ZZ                                                                                                                                                                                                                                                                                                                                                                                                                                                                                                                                                                                                                                                                                                                                                                                                                                                                                                                                                                                                                                                                                                                                                                                                                                                                                                                                                                                                                                                                                                                                      |
| Two or more vessel PCI  | 0271346 0272346 0273346 027134Z 027234Z 027334Z 0271356 0272356<br>0273356 027135Z 027235Z 027335Z 0271366 0272366 0273366 027136Z<br>027236Z 027336Z 0271376 0272376 0273376 027137Z 027237Z 027337Z<br>02713D6 02723D6 02733D6 02713DZ 02723DZ 02733DZ 02713E6 02723E6                                                                                                                                                                                                                                                                                                                                                                                                                                                                                                                                                                                                                                                                                                                                                                                                                                                                                                                                                                                                                                                                                                                                                                                                                                                                                                                                                                                                                                                                                                                                                                                                         |

|               |                                                                                                                                                                                                                                                                                                                                                                                                                                                                                                                                                                                                                                                                                                                                                                                                                                                                                                                                                                                                                                                                                                                                                                                                                                                                                                                                                                                                                                             |
|---------------|---------------------------------------------------------------------------------------------------------------------------------------------------------------------------------------------------------------------------------------------------------------------------------------------------------------------------------------------------------------------------------------------------------------------------------------------------------------------------------------------------------------------------------------------------------------------------------------------------------------------------------------------------------------------------------------------------------------------------------------------------------------------------------------------------------------------------------------------------------------------------------------------------------------------------------------------------------------------------------------------------------------------------------------------------------------------------------------------------------------------------------------------------------------------------------------------------------------------------------------------------------------------------------------------------------------------------------------------------------------------------------------------------------------------------------------------|
|               | 02733E6 02713EZ 02723EZ 02733EZ 02713F6 02723F6 02733F6 02713FZ<br>02723FZ 02733FZ 02713G6 02723G6 02733G6 02713GZ 02723GZ 02733GZ<br>02713T6 02723T6 02733T6 02713TZ 02723TZ 02733TZ 02713Z6 02723Z6<br>02733Z6 02713ZZ 02723ZZ 02733ZZ 0271446 0272446 0273446 027144Z<br>027244Z 027344Z 0271456 0272456 0273456 027145Z 027245Z 027345Z<br>0271466 0272466 0273466 027146Z 027246Z 027346Z 0271476 0272476<br>0273476 027147Z 027247Z 027347Z 02714D6 02724D6 02734D6 02714DZ<br>02724DZ 02734DZ 02714E6 02724E6 02734E6 02714EZ 02724EZ 02734EZ<br>02714F6 02724F6 02734F6 02714FZ 02724FZ 02734FZ 02714G6 02724G6<br>02734G6 02714GZ 02724GZ 02734GZ 02714T6 02724T6 02734T6 02714TZ<br>02724TZ 02734TZ 02714Z6 02724Z6 02734Z6 02714ZZ 02724ZZ 02734ZZ                                                                                                                                                                                                                                                                                                                                                                                                                                                                                                                                                                                                                                                                               |
| Diabetes      | E08.X-E13.X                                                                                                                                                                                                                                                                                                                                                                                                                                                                                                                                                                                                                                                                                                                                                                                                                                                                                                                                                                                                                                                                                                                                                                                                                                                                                                                                                                                                                                 |
| Hypertension  | I10                                                                                                                                                                                                                                                                                                                                                                                                                                                                                                                                                                                                                                                                                                                                                                                                                                                                                                                                                                                                                                                                                                                                                                                                                                                                                                                                                                                                                                         |
| Smoking       | F17-F17299, Z720, Z87891, Z716                                                                                                                                                                                                                                                                                                                                                                                                                                                                                                                                                                                                                                                                                                                                                                                                                                                                                                                                                                                                                                                                                                                                                                                                                                                                                                                                                                                                              |
| CKD           | N18x                                                                                                                                                                                                                                                                                                                                                                                                                                                                                                                                                                                                                                                                                                                                                                                                                                                                                                                                                                                                                                                                                                                                                                                                                                                                                                                                                                                                                                        |
| Dyslipidemia  | E780 E7800 E7801 E781 E782 E783 E784 E7841 E7849 E785                                                                                                                                                                                                                                                                                                                                                                                                                                                                                                                                                                                                                                                                                                                                                                                                                                                                                                                                                                                                                                                                                                                                                                                                                                                                                                                                                                                       |
| Cirrhosis     | K740 K7400 K7401 K7402 K741 K742 K743 K744 K745 K7460 K7469 K7030<br>K7031 P7881 K717                                                                                                                                                                                                                                                                                                                                                                                                                                                                                                                                                                                                                                                                                                                                                                                                                                                                                                                                                                                                                                                                                                                                                                                                                                                                                                                                                       |
| Prior stroke  | Z8673                                                                                                                                                                                                                                                                                                                                                                                                                                                                                                                                                                                                                                                                                                                                                                                                                                                                                                                                                                                                                                                                                                                                                                                                                                                                                                                                                                                                                                       |
| PVD           | I70.X, I73.9                                                                                                                                                                                                                                                                                                                                                                                                                                                                                                                                                                                                                                                                                                                                                                                                                                                                                                                                                                                                                                                                                                                                                                                                                                                                                                                                                                                                                                |
| Old MI        | I252                                                                                                                                                                                                                                                                                                                                                                                                                                                                                                                                                                                                                                                                                                                                                                                                                                                                                                                                                                                                                                                                                                                                                                                                                                                                                                                                                                                                                                        |
| Alcohol abuse | F1010 F1011 F10120 F10121 F10129 F10130 F10131 F10132 F10139 F1014<br>F10150 F10151 F10159 F10180 F10181 F10182 F10188 F1019 F1020 F1021<br>F10220 F10221 F10229 F10230 F10231 F10232 F10239 F1024 F10250<br>F10251 F10259 F1026 F1027 F10280 F10281 F10282 F10288 F1029 F1094<br>F10950 F10951 F10959 F1096 F1097 F10980 G621 I426 K2920 K2921 K7010<br>K7011 O99310 O99311 O99312 O99313 O99314 O99315                                                                                                                                                                                                                                                                                                                                                                                                                                                                                                                                                                                                                                                                                                                                                                                                                                                                                                                                                                                                                                    |
| Drug abuse    | F1110 F1111 F11120 F11121 F11122 F11129 F1113 F1114 F11150 F11151<br>F11159 F11181 F11182 F11188 F1119 F1120 F1121 F11220 F11221 F11222<br>F11229 F1123 F1124 F11250 F11251 F11259 F11281 F11282 F11288 F1129<br>F1210 F1211 F12120 F12121 F12122 F12129 F1213 F12150 F12151 F12159<br>F12180 F12188 F1219 F1220 F1221 F12220 F12221 F12222 F12229 F1223<br>F12250 F12251 F12259 F12280 F12288 F1229 F1310 F1311 F13120 F13121<br>F13129 F13130 F13131 F13132 F13139 F1314 F13150 F13151 F13159<br>F13180 F13181 F13182 F13188 F1319 F1320 F1321 F13220 F13221 F13229<br>F13230 F13231 F13232 F13239 F1324 F13250 F13251 F13259 F1326 F1327<br>F13280 F13281 F13282 F13288 F1329 F1410 F1411 F14120 F14121 F14122<br>F14129 F1413 F1414 F14150 F14151 F14159 F14180 F14181 F14182 F14188<br>F1419 F1420 F1421 F14220 F14221 F14222 F14229 F1423 F1424 F14250<br>F14251 F14259 F14280 F14281 F14282 F14288 F1429 F1510 F1511 F15120<br>F15121 F15122 F15129 F1513 F1514 F15150 F15151 F15159 F15180 F15181<br>F15182 F15188 F1519 F1520 F1521 F15220 F15221 F15222 F15229 F1523<br>F1524 F15250 F15251 F15259 F15280 F15281 F15282 F15288 F1529 F1610<br>F1611 F16120 F16121 F16122 F16129 F1614 F16150 F16151 F16159 F16180<br>F16183 F16188 F1619 F1620 F1621 F16220 F16221 F16229 F1624 F16250<br>F16251 F16259 F16280 F16283 F16288 F1629 F1810 F1811 F18120 F18121<br>F18129 F1814 F18150 F18151 F18159 F1817 F18180 F18188 F1819 F1820 |

|                     |                                                                                                                                                                                                                                                                                                                                                                                                                                       |
|---------------------|---------------------------------------------------------------------------------------------------------------------------------------------------------------------------------------------------------------------------------------------------------------------------------------------------------------------------------------------------------------------------------------------------------------------------------------|
|                     | F1821 F18220 F18221 F18229 F1824 F18250 F18251 F18259 F1827 F18280<br>F18288 F1829 F1910 F1911 F19120 F19121 F19122 F19129 F19130 F19131<br>F19132 F19139 F1914 F19150 F19151 F19159 F1916 F1917 F19180 F19181<br>F19182 F19188 F1919 F1920 F1921 F19220 F19221 F19222 F19229 F19230<br>F19231 F19232 F19239 F1924 F19250 F19251 F19259 F1926 F1927 F19280<br>F19281 F19282 F19288 F1929 O99320 O99321 O99322 O99323 O99324<br>O99325 |
| Procedural bleeding | I97410 I97411 I97610 I97611 I97630 I97631                                                                                                                                                                                                                                                                                                                                                                                             |
| Cardiac perforation | I9751                                                                                                                                                                                                                                                                                                                                                                                                                                 |
| AIS                 | I63x                                                                                                                                                                                                                                                                                                                                                                                                                                  |
| Cardiac tamponade   | I314                                                                                                                                                                                                                                                                                                                                                                                                                                  |
| Cardiogenic shock   | R570                                                                                                                                                                                                                                                                                                                                                                                                                                  |
| AKI                 | N17x                                                                                                                                                                                                                                                                                                                                                                                                                                  |
